# Supplementary material for: Preparation of a leaf-like CdS micro-/nanostructure and its enhanced gas-sensing properties for detecting volatile organic compounds
Source: Royal Society of Chemistry journal article supplement (doi:10.1039/c2jm33352j), 2012-01-01
Supplement: c2jm33352j.pdf [file c2jm33352j.pdf]

**Supporting Information** for “Preparation of a leaf-like CdS micro-/nanostructure and its enhanced gas-sensing properties for detecting volatile organic compounds”

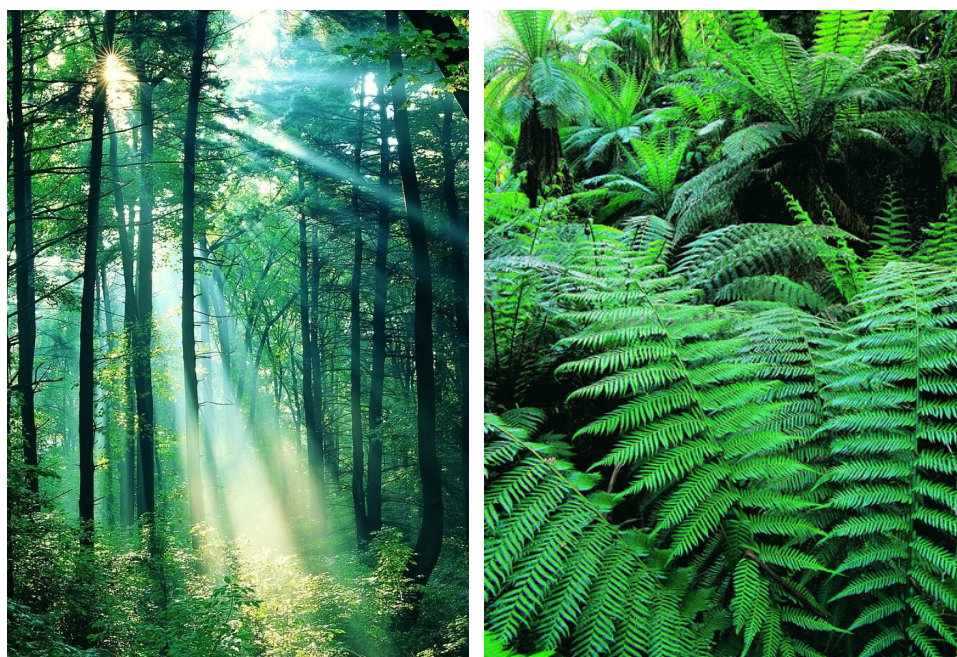

**Fig. S1** The photo the plant and their leaves in nature.

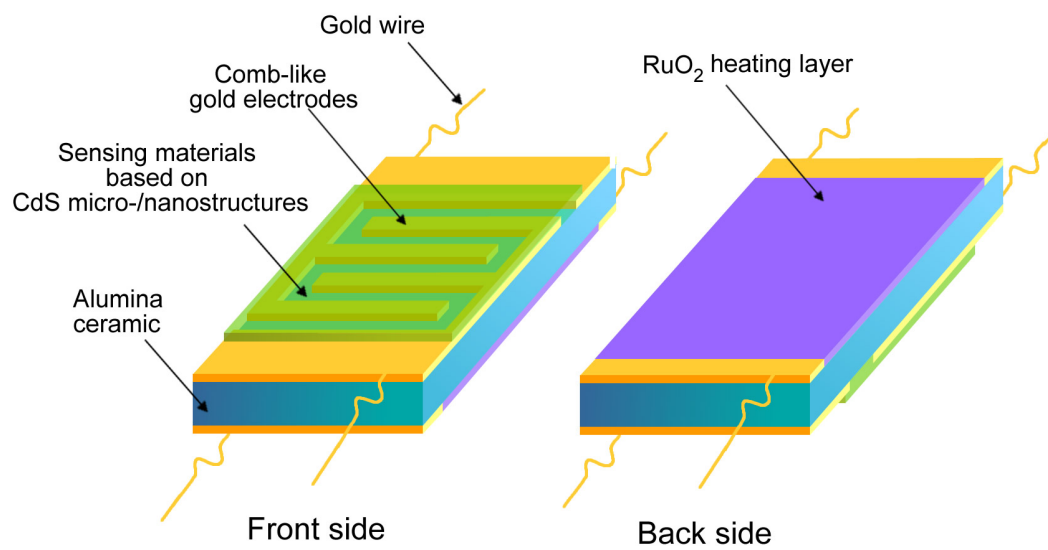

**Fig. S2** Illustration of the gas sensor based on CdS micro-/nanostructures.

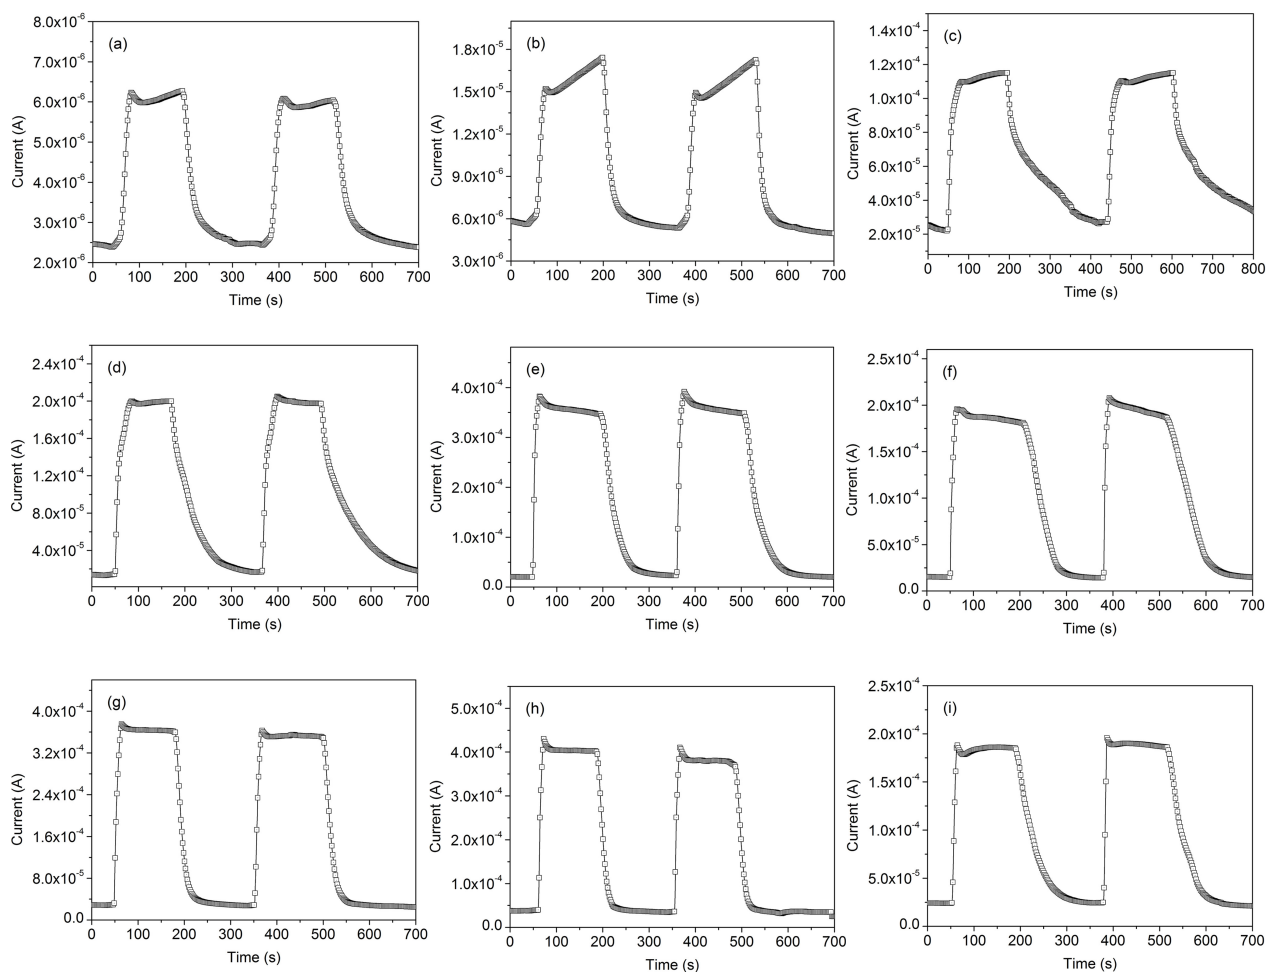

**Fig. S3** Real-time gas-sensing responses of the gas sensor based on leaf-like CdS micro-/nanostructures towards 100 ppm aether at different working temperatures: (a) 120 °C; (b) 145 °C; (c) 170 °C; (d) 190 °C; (e) 210 °C; (f) 220 °C; (g) 230 °C; (h) 245 °C; (i) 260 °C.

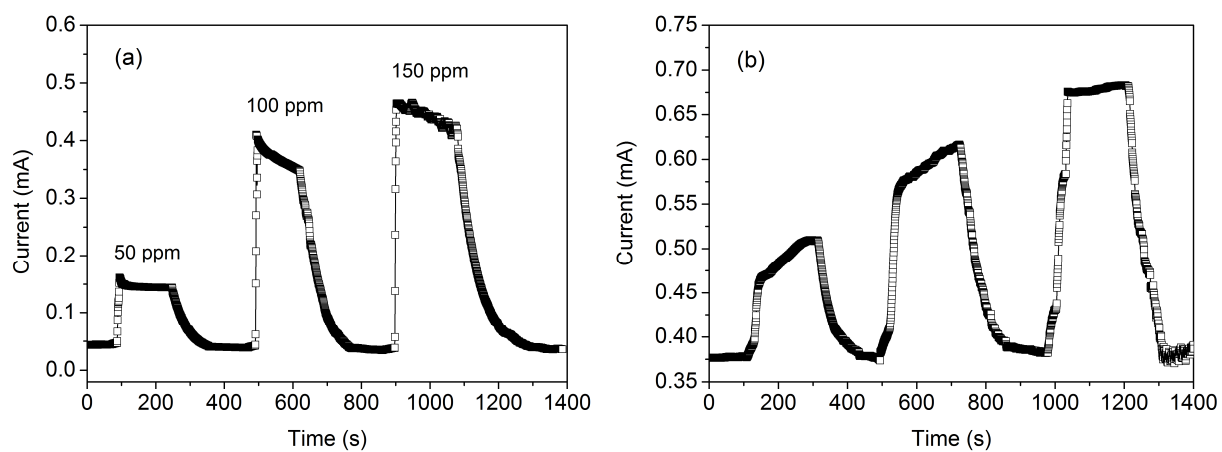

**Fig. S4** Real-time gas-sensing responses of the gas sensor based on leaf-like CdS micro-/nanostructures towards (a) butanol and (b) ammonia at concentrations from 50 to 150 ppm.
